# Supplementary material for: Design and study of the efflux function of the EGFP fused MexAB-OprM membrane transporter in Pseudomonas aeruginosa using fluorescence spectroscopy
Source: Royal Society of Chemistry journal article supplement (doi:10.1039/c4an00108g), 2014-01-01
Supplement: c4an00108g1.pdf [file c4an00108g1.pdf]

## On-Line Supplementary Information

### Design and Study of Efflux Function of EGFP Fused MexAB-OprM

#### Membrane Transporter in *Pseudomonas aeruginosa*

#### Using Fluorescence Spectroscopy

Feng Ding<sup>1</sup>, Kerry J. Lee<sup>1</sup>, Ardeschir Vahedi-Faridi<sup>1</sup>, Hiroshi Yoneyama<sup>3</sup>, Christopher J. Osgood<sup>2</sup>, and Xiao-Hong Nancy Xu<sup>1\*</sup>

<sup>1</sup>*Department of Chemistry and Biochemistry, and* <sup>2</sup>*Department of Biological Sciences, Old Dominion University, Norfolk, VA 23529, USA*

<sup>3</sup>*Laboratory of Animal Microbiology, Tohoku University, Sendai 981-8555, Japan*

The on-line supplementary information includes:

Two figures:

**Figure S1:** Construction of fusion *egfp-mexB*

**Figure S2:** DNA sequence of *egfp-mexB*

---

\* To whom correspondence should be addressed: Email: [xhxu@odu.edu](mailto:xhxu@odu.edu); [www.odu.edu/sci/xu/xu.htm](http://www.odu.edu/sci/xu/xu.htm);  
Tel/fax: (757) 683-5698

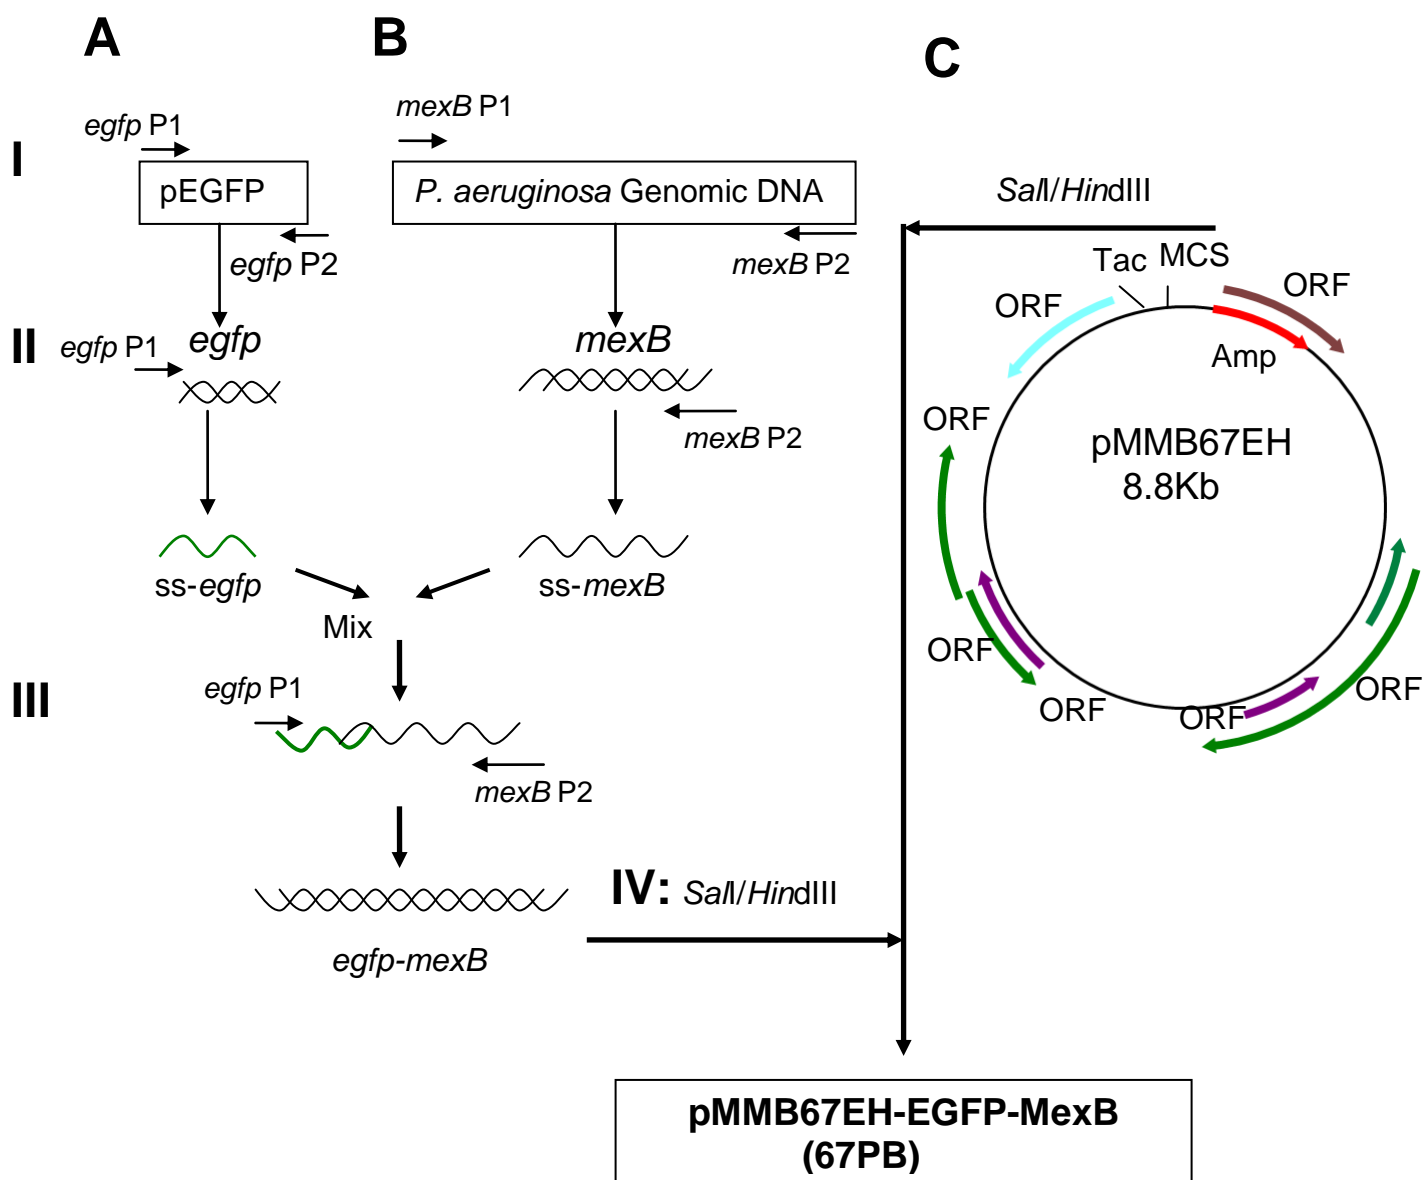

**Fig. S1:** The schematic outlines construction of fusion *egfp-mexB* gene. **(A): (I)** The ds-*egfp* gene is amplified using EGFP plasmid as a template, and both *egfp* P1 (5'-CTTGTGCGACAAGGGGATCCACCATGGTGAGCAAGG-3') and *egfp* P2 (5'-CAATGAAAACTTCGACATCTTGTACAGCTCGTCCATGC-3') as primers. **(II)** The coding strand of *egfp* gene (ss-*egfp*) is generated using the amplified ds-*egfp* gene as the template and *egfp* P1 as the primer. **(B): (I)** The ds-*mexB* gene is produced using genomic DNA of *P. aeruginosa* as a template, and both *mexB* P1 (5'-GCATGGACGAGCTGTACAAGATGTGCGAAGTTTTTCATTG-3') and *mexB* P2 (5'-GATAAGCTTATCATTGCCCTTTTCGAC-3') as primers. **(II)** The template strand of *mexB* gene (ss-*mexB*) is created using the ds-*mexB* as a template, and *mexB* P2 as a primer. **(III)** By mixing the ss-*egfp* with ss-*mexB*, it creates 20 base-pair (bp) ds-DNA that links the ss-*egfp* with ss-*mexB*, which is used as a template to generate and amplify *egfp-mexB* fusion gene using both *egfp* P1 and *mexB* P2 as primers. **(IV)** The purified *egfp-mexB* gene and **(C)** vector (pMMB67EH) are digested by a pair of restriction enzymes (*SalI/HindIII*). The digested and purified *egfp-mexB* gene is inserted into the digested vector (pMMB67EH) to produce pMMB67EH-EGFP-MexB vector via ligation.

CTTGTCGACAAGGGGATCCACC**atg**gtgagcaagggcgaggagctgttaccggggtggtgccatcctggtcgagctggac  
 ggcgacgtaaacggccacaagttcagcgtgtccggcgagggcgagggcgatgccacctcggcaagctgacctgaagttcatctgcacc  
 accggcaagctgcccgtgccctggcccaccctcgtgaccaccctgacctacggcgtgcagtgctcagccgctaccccgaccacatgaagc  
 agcacgacttctcaagtccgcatgcccgaaggctacgtccaggagcgcaccatcttctcaaggacgacggcaactacaagaccgcg  
 cgaggtgaagttcgagggcgacaccctggtgaaccgcatcgagctgaagggcatcgactcaaggaggacggcaacatcctggggcaca  
 agctggagtacaactacaacagccacaacgtctatatcatggccgacaagcagaagaacggcatcaaggtgaactcaagatccgccaca  
 acatcgaggacggcagcgtgcagctcgccgaccactaccagcagaacacccccatcggcgacggccccgtgctgctgccgacaaccac  
 tacctgagcaccagtcggccctgagcaaagacccaacgagaagcgcgatcacatggtcctgctggagttcgtgaccgccgcccggatc  
 actctcggcatggacgagctgtacaagatgtcgaagttttcattgataggcccatttgcgctgggtgatcgccttggtgatcatgctcggggcg  
 gcctgtgatcctcagctcgtccggtcaaccgtagccggcctcgcggccggcctcgcctgacaggtgagctacccgggcccctcggcc  
 gagacggtgcaggacaccgtggtccaggtgatcgagcagcagatgaacgggatcgacaatctgcgctacatctcctcgagagtaactccg  
 acggcagcatgaccatcaccgtgaccttgaacagggcaccgacccccgacatcgccagggtccaggtgcagaacaagctgcaactggcc  
 accccgctactgccgaggaagtgcagcgcaggggatccgggtgaccaaggcgggtgaagaactcctcatggtggtcggtggtttccac  
 cgacggcagcatgaccaaggaagacctgtcgaactacatggtccaacatccaggaccactctcgggaccaagggcgctcggtgacttc  
 caggtgttcggctcgcagtactcagtgcgcatctggtcgcaccggccaagctgaacagctaccagctgacccccggcgacgtgagcagcg  
 cgatccaggcgcagaacgtgcagatttctccggccagctcggcggttgcggcggtcaagggccagcagctcaacgccaccatcatcg  
 caagaccgctgcagaccgcgagcaattcgagaacatcctgctcaaggtcaatcccgcaggttcccagggtgcgctgaaggacgtgc  
 cgatgtaggcctggggggccaggactacagcatcaacgcgcagttcaacggcagccccggctccggtatcgcgatcaagctggccaccgg  
 cgcaaacgcgctggataaccgcaaggcgatccgccagaccatcgcaaacctggaaccgttcatgccgagggcatgaaggtggttacc  
 gtacgacaccacccccggtggtctcggcctcgatccatgaggtagtgaagaccctcggcgagggcatcctcctcgttctcgtgatgtacctg  
 tctcgcagaacttccgcccacgctgatcccgaccatcgccgtaccgggtggtgctgctggtgggacctcggcgtgctcggcgttccggttctc  
 atcaacaccctgaccatggtcggcatggtgctggccatcggttctggtgagcagcagcagcagcagcagcagcagcagcagcagcagc  
 gccgaggaaggcctgtcgaaggagggcgcgcaagtcctggtggccagatccaggcgcgctggtcggtatcgccatggtgctcgc  
 gcggtattcctcggatggcgttctcggcggtccaccggggtgatctaccggcagttctccatcaccatcggtcggccatggccctcctcgg  
 atcgtggcgtgatcctcaccggcgtctcgcgaccatgctcaagccgatcgagaaaggcgaccatggcgagcacaagggcggttct  
 tcggctggttcaaccgatgttcttccaccaccacggctacgagcggggcgtggcgtcgcgatcctcaagcatcgcgcgctacctgctgat  
 ctacgtggtgatcgtggccgggatgatctggatgttaccggcatttccaccgcgttctccccgacgaggaccagggcgactgttcgccag  
 gtacagacccccgggggtccagtgccgagcgtaccaggtggtggtgactcgcgcgaatacctgctggagaaggaaagcttccg  
 tcagctcgggttaccgtgaccggctcaactcgcggccgcgccagagttcgggcatggcgttcatcatgctcaagccctgggaagagc  
 gtcccgggtggcgaacagcgtgttcaactggccaagcgcgcgagatgacttctcagcttcaaggacgcgatggtgttcgcttccg  
 cgccgtcggactggaactgggtaacgccaccggcttcgacctgtcctccaggaccagggcgggtgctggccacgaagctcctgctccaggcg  
 cgcaacaagttcctcatgctcggcgcgagaaccggcgtgcaacgcgtgcgccccaacggcatgagcgcgaaccgcagtaacaagct  
 ggagatcgacgacgagaaggccagcgcctcggcgtgtcccttgcgacatcaacagcaccgtgtccatcgctgggggttccagctacgtc  
 aacgatttcatcgaccgtggccgggtcaagcgggttacctgcagggcagggcggacgcggatgaaccggacgacctgagcaagtg  
 gtacgtgcgcaacgacaaggcgagatggtgccgttcaacgccttgcaccgggcaagtggaatacgggttcgccaagctggagcgta  
 caatggcgtgccggcgatggagatcctcggcgagccggcgccccgctgagttccggtgacgcatggcggcggtcgaggagatcgtcaa  
 gcaattgccgaaaggcgttggctactcctggaccggcctgtcctacgaggagcgttgcggcgtcgcaggcggcgctgtatcgcgtg  
 gctgctggtggttctcctcgtcctggcggccctgtacgaaagctggtcgattcgttctcgggtgatgctggtggtgccgttggcggtgatcgggtcg  
 ctgctggcgacgtccatgcgcggcctgtccaacgacgtgttctccaggtggcctgttgacgaccatcggcctgtcggcgaagaacgccattc  
 tcatcgtggagttcgccaaggagctgcacgagcagggcaagggcatcgtcgaggcggccatcgaagcctgccgatcgtctcggccga  
 tcgtgatgacctcctggcgttcatcctcggcgtggtcccgtggcgtatcctcaccggcggcggcctcggcgagccagcatcgcgatcggatccg  
 gcgtgatcggcggcatggtcactgcgaccgtcctggcgtatcttctgggtaccgctgttctacgtggcggctcagcagcgtgttcaaggacgaggg  
 gtccaagcagcagggcgtccgtcgaaaaggggcaa**TGATAAGCTT**ATC

**Fig. S2:** DNA sequence of *egfp-mexB* constructed and purified as described in the main text and sequenced using DNA sequencer (Applied Biosystem, 3730xl DNA Analyzer). Start codon of **ATG** and stop codon of **TGA** are marked in red and green, respectively. The underlined **GTCGAC** and **AAGCTT** are *SalI* and *HindIII* sites, respectively.
